# Supplementary material for: A unique covalently linked pyridine-tetrathiafulvalene as a stimuli-sensitive sensor for the specific, selective optical and electrochemical detection of Pb2+
Source: Royal Society of Chemistry journal article supplement (doi:10.1039/d3nj02637j), 2023-01-01
Supplement: d3nj02637j1.pdf [file d3nj02637j1.pdf]

## A unique covalently-linked pyridine-tetrathiafulvalene as stimuli-sensitive sensor for specific, selective optical and electrochemical detection of Pb<sup>2+</sup>

Wenhao Zhang,<sup>[a]</sup> Sagrario Pascual,<sup>[a]</sup> Stéphanie Legoupy,<sup>[b]</sup> Abdelkrim El-Ghayoury,<sup>\*[b]</sup> Sandie Piogé<sup>\*[a]</sup>

---

[a] Title(s), Initial(s), Surname(s) of Author(s) including Corresponding Author(s)

Institut des Molécules et Matériaux du Mans, IMMM UMR 6283 CNRS

Le Mans Université

Avenue Olivier Messiaen, Le Mans 72085 Cedex 9, France

E-mail: [sandie.pioge@univ-lemans.fr](mailto:sandie.pioge@univ-lemans.fr)

[b] Title(s), Initial(s), Surname(s) of Author(s)

Univ Angers, CNRS, MOLTECH-Anjou, SFR Matrix

2 Bd Lavoisier

F-49000, Angers, France

E-mail: [abdelkrim.elghayoury@univ-angers.fr](mailto:abdelkrim.elghayoury@univ-angers.fr)

### Table of contents

|                                                                                                                                                                                                                                                                                                                                                                                                                                 |     |
|---------------------------------------------------------------------------------------------------------------------------------------------------------------------------------------------------------------------------------------------------------------------------------------------------------------------------------------------------------------------------------------------------------------------------------|-----|
| <b>Fig. S1</b> : <sup>1</sup> H NMR spectrum in CDCl <sub>3</sub> of <b>A</b>                                                                                                                                                                                                                                                                                                                                                   | p.2 |
| <b>Fig. S2</b> : <sup>13</sup> C NMR spectrum in CDCl <sub>3</sub> of <b>A</b>                                                                                                                                                                                                                                                                                                                                                  | p.3 |
| <b>Fig. S3</b> : <sup>1</sup> H NMR spectrum in CDCl <sub>3</sub> of dyad <b>1</b>                                                                                                                                                                                                                                                                                                                                              | p.4 |
| <b>Fig. S4</b> : <sup>13</sup> C NMR spectrum in CDCl <sub>3</sub> of dyad <b>1</b>                                                                                                                                                                                                                                                                                                                                             | p.5 |
| <b>Fig. S5</b> : Mass spectrum of dyad <b>1</b>                                                                                                                                                                                                                                                                                                                                                                                 | p.5 |
| <b>Fig. S6</b> : CV experiment of dyad <b>1</b> (10 <sup>-3</sup> M) in CH <sub>2</sub> Cl <sub>2</sub> /CH <sub>3</sub> CN (1/1, v/v); 100 mV/s, <i>n</i> Bu <sub>4</sub> PF <sub>6</sub> (10 <sup>-1</sup> M), vs Ag/AgCl, (vs Fc/Fc <sup>+</sup> )                                                                                                                                                                           | p.6 |
| <b>Fig. S7</b> : UV-visible titration of dyad <b>1</b> (C = 1.10 <sup>-5</sup> M) in CH <sub>2</sub> Cl <sub>2</sub> /CH <sub>3</sub> CN (1/1) by Fe <sup>2+</sup> solution (Fe(ClO <sub>4</sub> ) <sub>2</sub> , 4.10 <sup>-3</sup> M in CH <sub>2</sub> Cl <sub>2</sub> /CH <sub>3</sub> CN (1/1))                                                                                                                            | p.6 |
| <b>Fig. S8</b> : UV-visible titration of dyad <b>1</b> (C = 1.10 <sup>-5</sup> M) in CH <sub>2</sub> Cl <sub>2</sub> /CH <sub>3</sub> CN (1/1) by Zn <sup>2+</sup> solution (Zn(ClO <sub>4</sub> ) <sub>2</sub> , 4.10 <sup>-3</sup> M in CH <sub>2</sub> Cl <sub>2</sub> /CH <sub>3</sub> CN (1/1))                                                                                                                            | p.7 |
| <b>Fig. S9</b> : UV-visible titration of dyad <b>1</b> (C = 1.10 <sup>-5</sup> M) in CH <sub>2</sub> Cl <sub>2</sub> /CH <sub>3</sub> CN (1/1) by Cd <sup>2+</sup> solution (Cd(ClO <sub>4</sub> ) <sub>2</sub> , 4.10 <sup>-3</sup> M in CH <sub>2</sub> Cl <sub>2</sub> /CH <sub>3</sub> CN (1/1))                                                                                                                            | p.7 |
| <b>Fig. S10</b> : Further study of UV-visible titration of dyad <b>1</b> (10 <sup>-5</sup> M) in CH <sub>2</sub> Cl <sub>2</sub> /CH <sub>3</sub> CN (1/1, v/v) in presence of Pb(ClO <sub>4</sub> ) <sub>2</sub>                                                                                                                                                                                                               | p.8 |
| <b>Fig. S11</b> : CV spectra of dyad <b>1</b> (C <sub>0</sub> = 10 <sup>-3</sup> mol.L <sup>-1</sup> in CH <sub>2</sub> Cl <sub>2</sub> /CH <sub>3</sub> CN (1/1 v/v)) in presence of Zn(ClO <sub>4</sub> ) <sub>2</sub> or Fe(ClO <sub>4</sub> ) <sub>2</sub> , speed of tension variation = 100 mV.s <sup>-1</sup> , Bu <sub>4</sub> NPF <sub>6</sub> (10 <sup>-1</sup> mol.L <sup>-1</sup> ), Ag/AgCl, vs Fc/Fc <sup>+</sup> | p.8 |

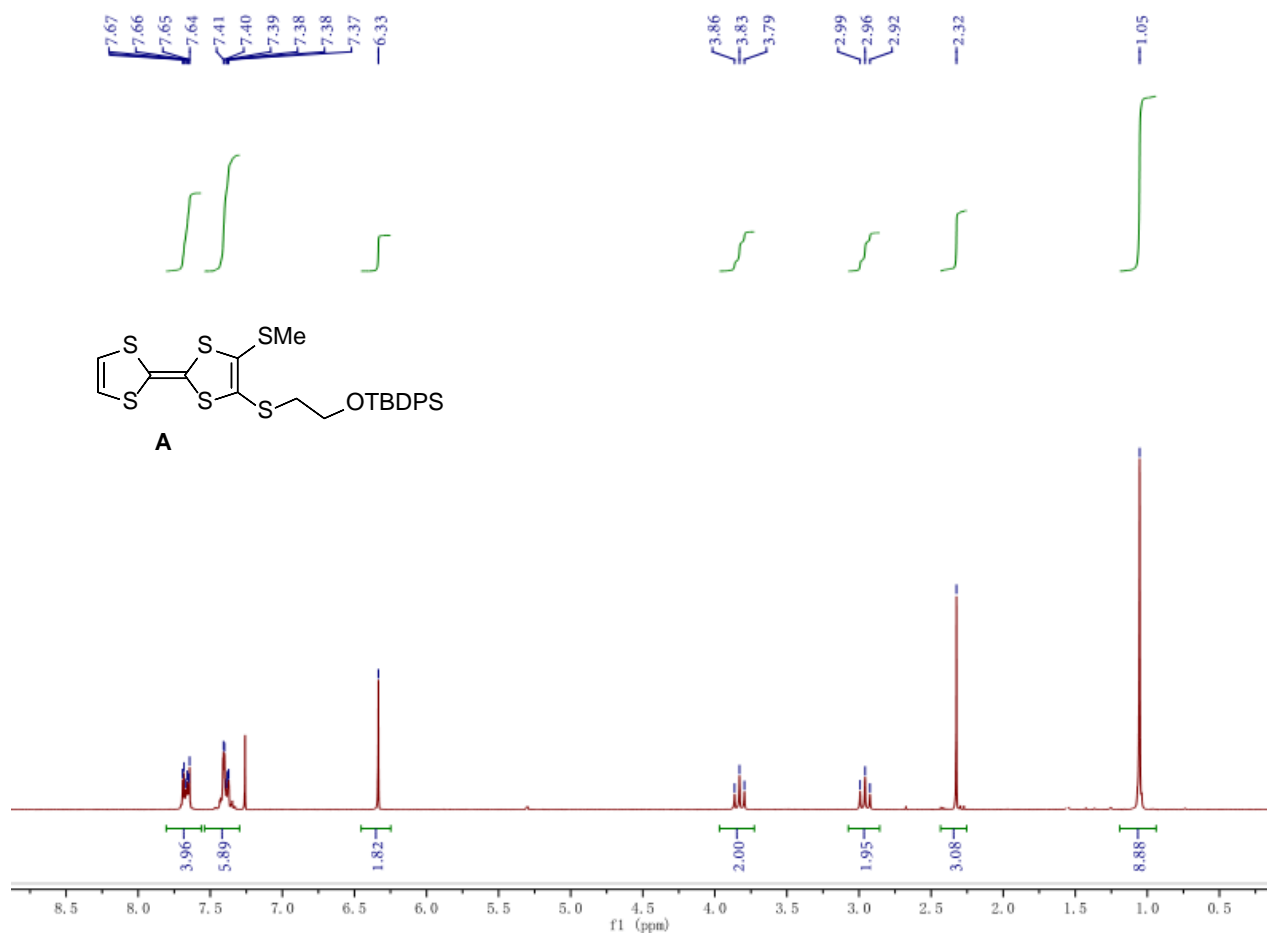

Fig. S1. <sup>1</sup>H NMR spectrum in CDCl<sub>3</sub> of A.

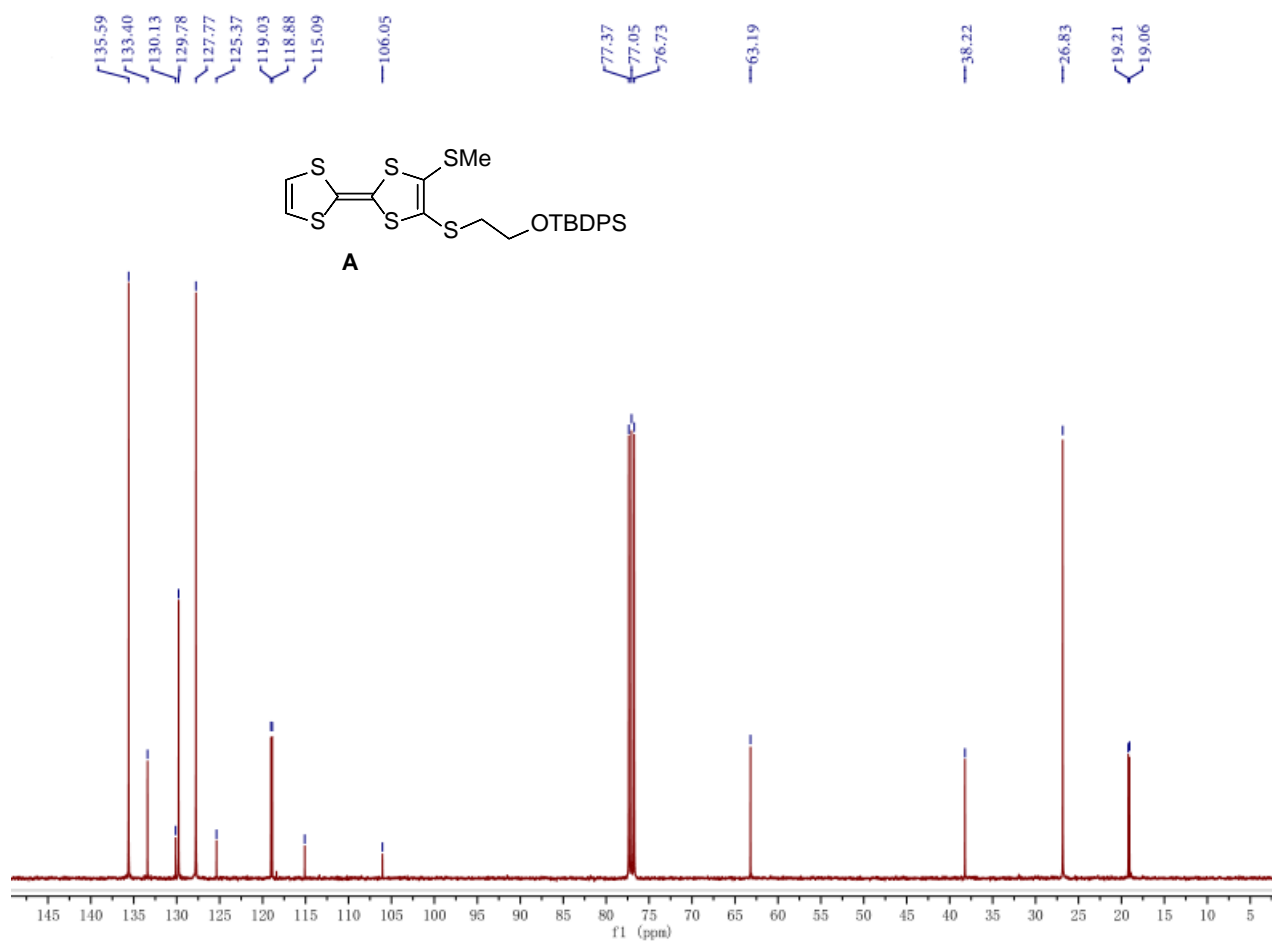

**Fig. S2.**  $^{13}\text{C}$  NMR spectrum in  $\text{CDCl}_3$  of **A**.

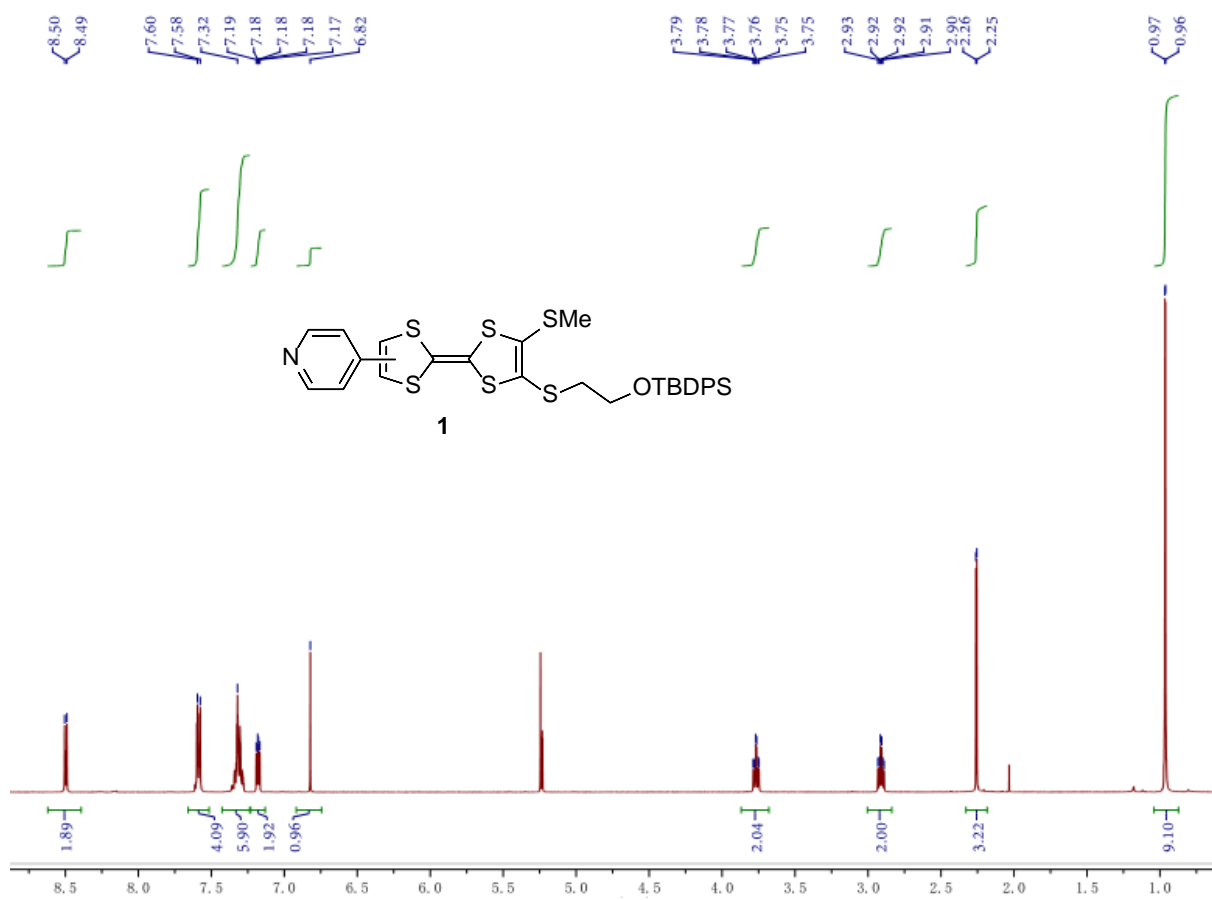

**Fig. S3.** <sup>1</sup>H NMR spectrum in CDCl<sub>3</sub> of dyad **1**.

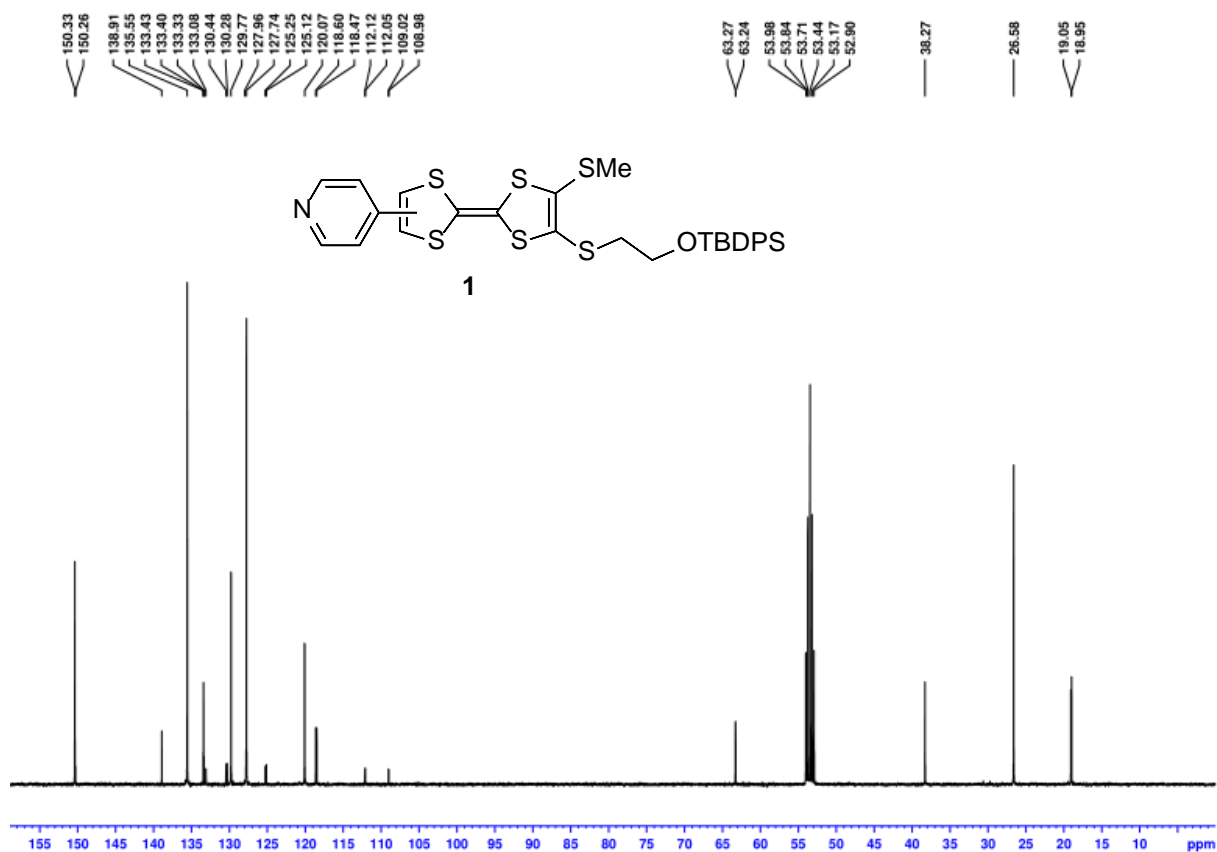

Fig. S4. <sup>13</sup>C NMR spectrum in CDCl<sub>3</sub> of dyad 1.

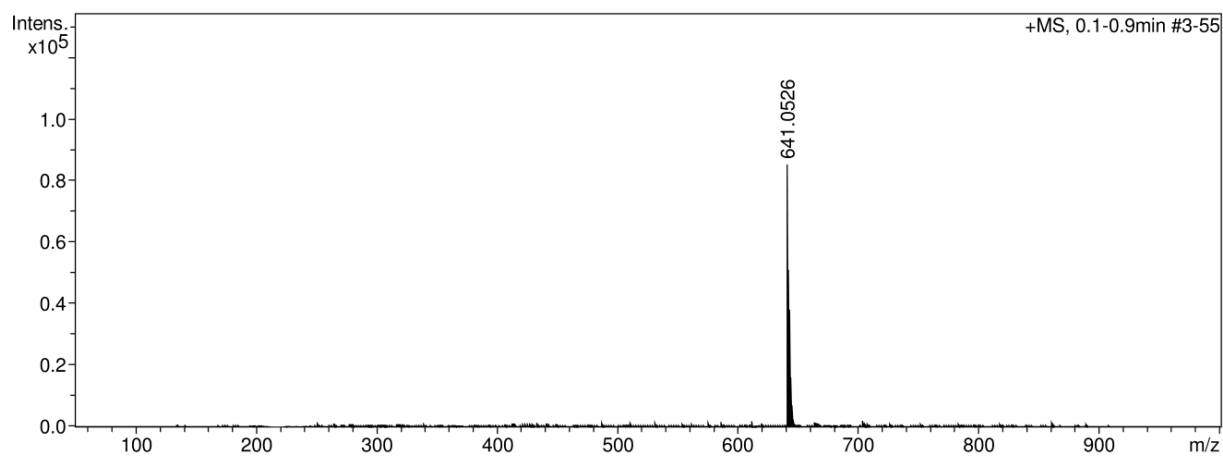

Fig. S5. Mass spectrum of dyad 1.

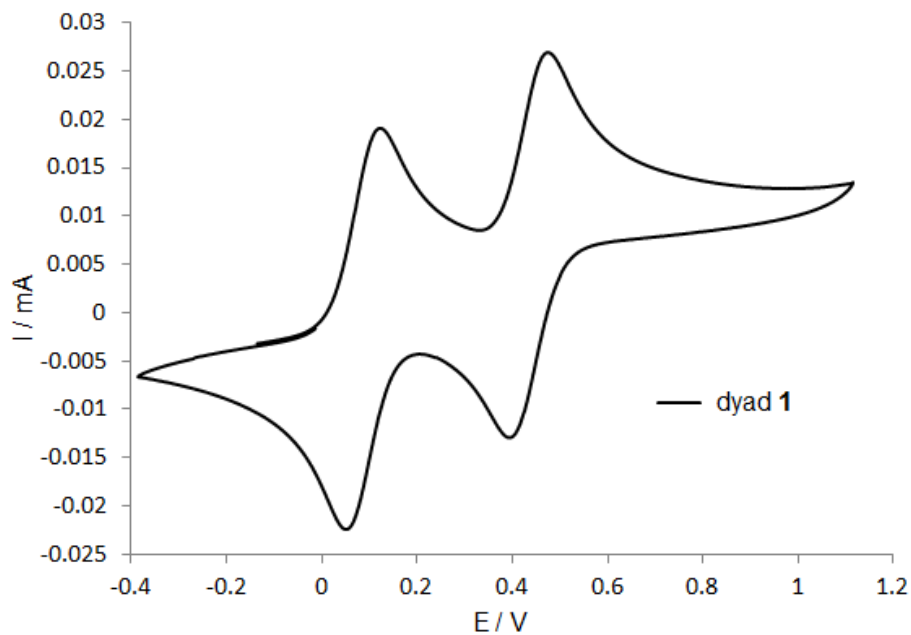

**Fig. S6.** CV experiment of dyad **1** ( $10^{-3}$  M) in  $\text{CH}_2\text{Cl}_2/\text{CH}_3\text{CN}$  (1/1, v/v); scan rate = 100 mV/s,  $n\text{Bu}_4\text{PF}_6$  ( $10^{-1}$  M), Ag/AgCl, vs Fc/Fc $^+$ ).

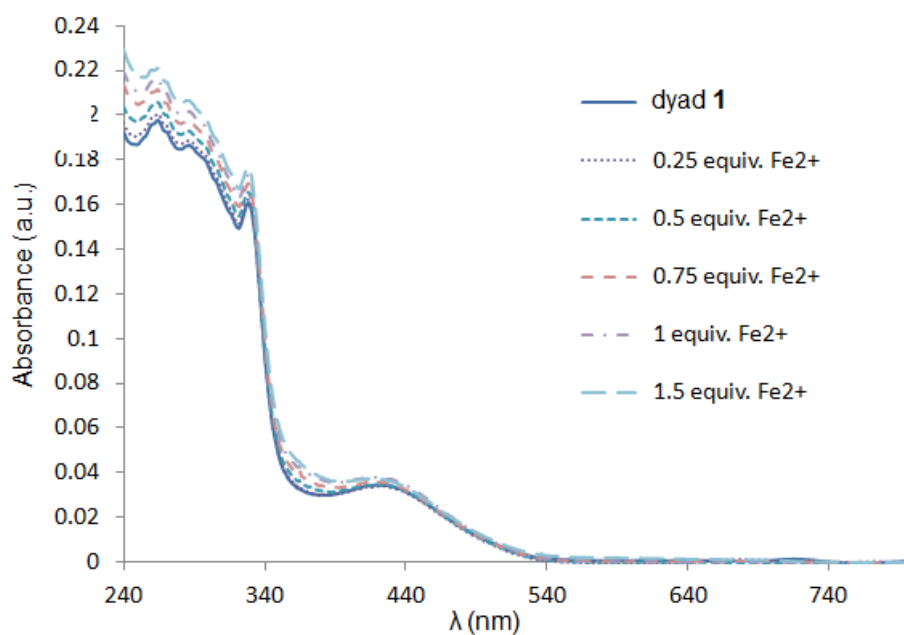

**Fig. S7.** UV-visible titration of dyad **1** ( $C = 1.10^{-5}$  M) in  $\text{CH}_2\text{Cl}_2/\text{CH}_3\text{CN}$  (1/1) by  $\text{Fe}^{2+}$  solution ( $\text{Fe}(\text{ClO}_4)_2$ ,  $4.10^{-3}$  M in  $\text{CH}_2\text{Cl}_2/\text{CH}_3\text{CN}$  (1/1)).

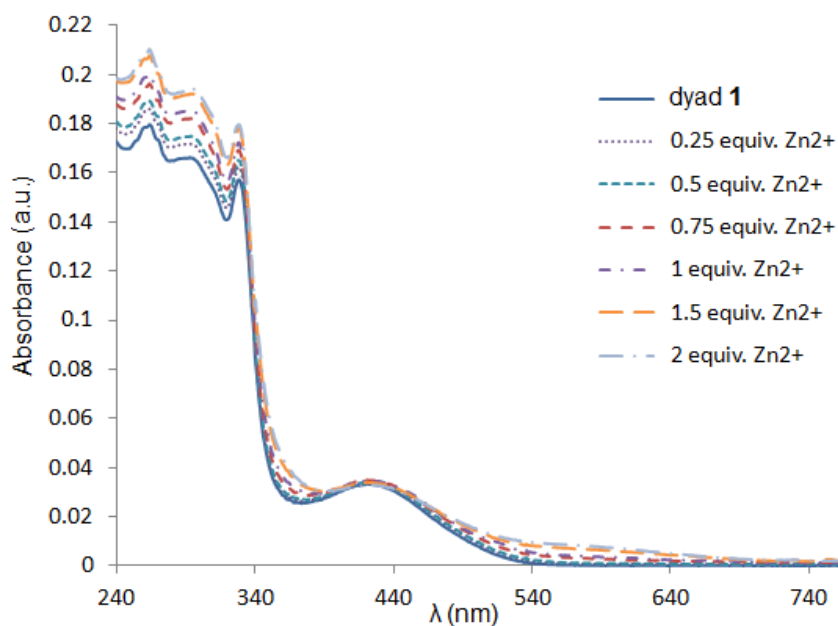

**Fig. S8.** UV-visible titration of dyad **1** ( $C = 1.10^{-5}$  M) in  $\text{CH}_2\text{Cl}_2/\text{CH}_3\text{CN}$  (1/1) by  $\text{Zn}^{2+}$  solution ( $\text{Zn}(\text{ClO}_4)_2$ ,  $4.10^{-3}$  M in  $\text{CH}_2\text{Cl}_2/\text{CH}_3\text{CN}$  (1/1)).

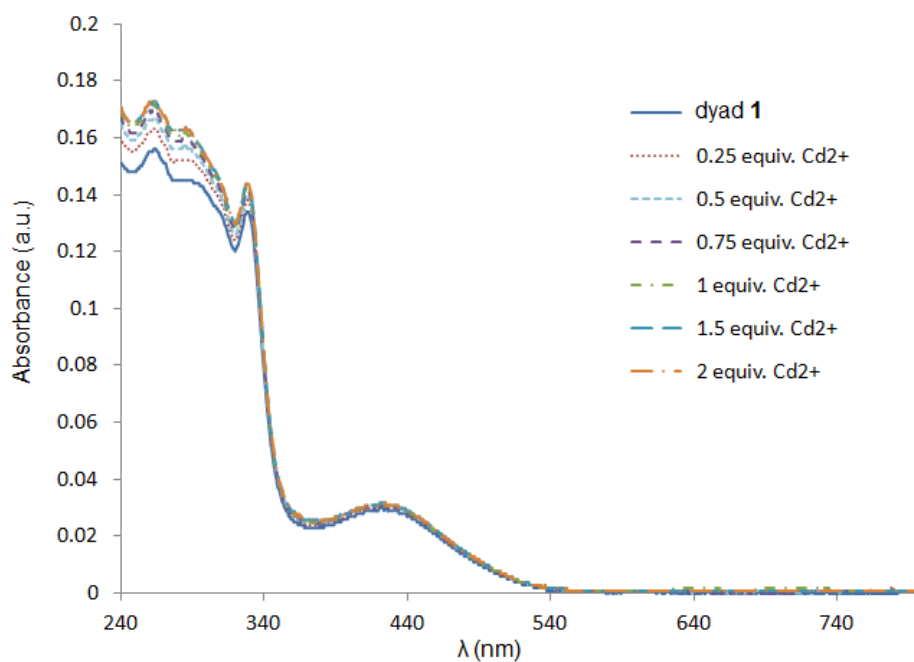

**Fig. S9.** UV-visible titration of dyad **1** ( $C = 1.10^{-5}$  M) in  $\text{CH}_2\text{Cl}_2/\text{CH}_3\text{CN}$  (1/1) by  $\text{Cd}^{2+}$  solution ( $\text{Cd}(\text{ClO}_4)_2$ ,  $4.10^{-3}$  M in  $\text{CH}_2\text{Cl}_2/\text{CH}_3\text{CN}$  (1/1)).

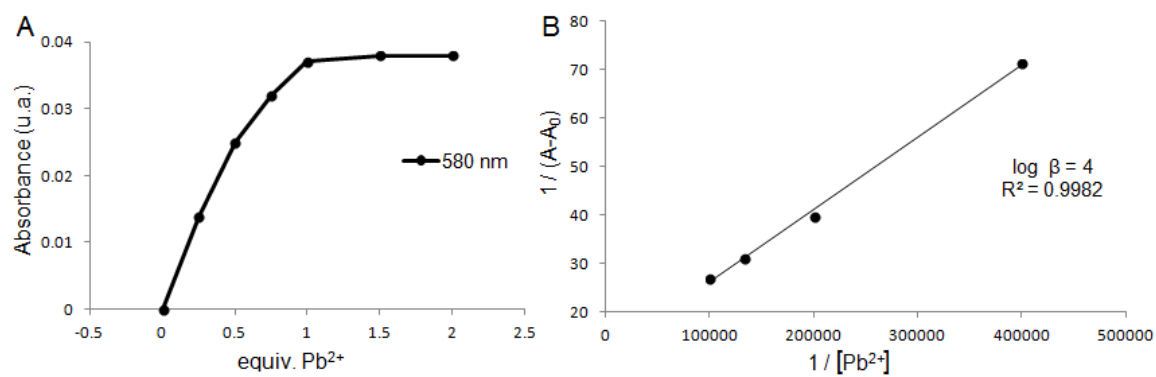

**Fig. S10.** Further study of UV-visible titration of dyad **1** ( $10^{-5}$  M) in  $CH_2Cl_2/CH_3CN$  (1/1, v/v) in presence of  $Pb(ClO_4)_2$ .

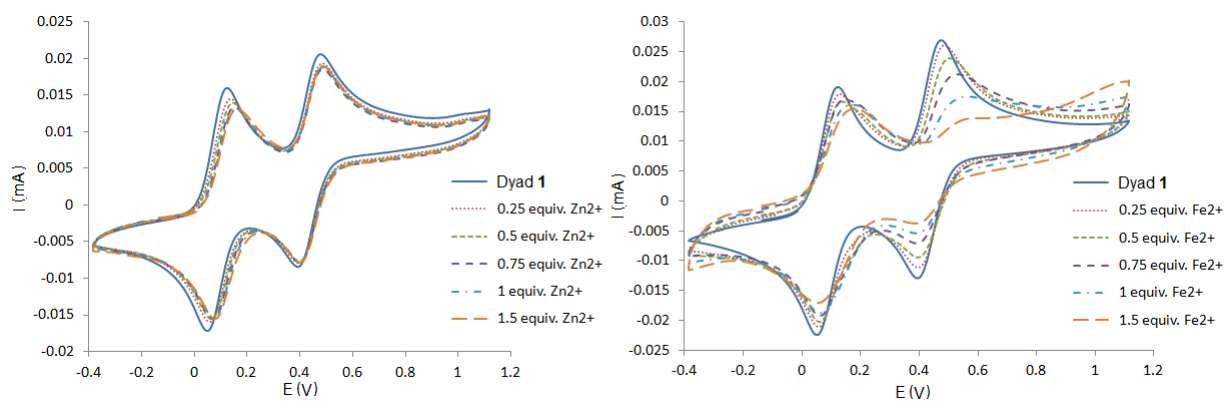

**Fig. S11.** CV spectra of dyad **1** ( $C_0 = 10^{-3}$  mol.L $^{-1}$  in  $CH_2Cl_2/CH_3CN$  (1/1 v/v)) in presence of  $Zn(ClO_4)_2$  (left spectrum) or  $Fe(ClO_4)_2$  (right spectrum), scan rate = 100 mV.s $^{-1}$ ,  $Bu_4NPF_6$  ( $10^{-1}$  mol.L $^{-1}$ ), Ag/AgCl, vs Fc/Fc $^{+}$ .
